# Supplementary material for: Plasma Lysyl-tRNA Synthetase 1 (KARS1) as a Novel Diagnostic and Monitoring Biomarker for Colorectal Cancer
Source: MDPI journal article supplement (doi:10.3390/jcm9020533), 2020-02-15
Supplement: s1 [file s1]

**Table S3. Statistical summary for Pearson correlation coefficient (Pearson  $r$ ) of plasma proteins.**

| <b>Marker</b> | <b>Pearson <math>r</math></b> | <b><math>p</math>- value</b> |
|---------------|-------------------------------|------------------------------|
| KARS1         | 0.2183                        | 0.005                        |
| AIMP1         | -0.0506                       | 0.520                        |
| GARS1         | 0.0838                        | 0.286                        |
| IL-10         | 0.0683                        | 0.385                        |
| CA 19-9       | 0.2322                        | 0.003                        |
| CEA           | 0.1084                        | 0.167                        |

AIMP1, Aminoacyl tRNA synthetase-interacting multifunctional protein 1; GARS1, Glycyl-tRNA synthetase 1; KARS1, Lysyl-tRNA synthetase 1; IL, Interleukin; CEA, Carcinoembryonic antigen; Each of Pearson  $r$  value was calculated based on comparison between tumor size and plasma marker level.  $p$  value computed two-tailed null hypothesis.
