# Supplementary material for: Plasma Lysyl-tRNA Synthetase 1 (KARS1) as a Novel Diagnostic and Monitoring Biomarker for Colorectal Cancer
Source: MDPI journal article supplement (doi:10.3390/jcm9020533), 2020-02-15
Supplement: s1 [file s1]

**Table S4. Comparison of the plasma level of KARS1 and CEA in paired pre- and post-surgery CRC patients**

| (pg/mL) | Pre        | Post      | <i>p</i> -value |
|---------|------------|-----------|-----------------|
| KARS1   | 8224±861.4 | 2273±300  | < 0.0001        |
| CEA     | 16008±6066 | 4236±1181 | 0.0293          |

mean ± SEM; SEM, Standard error of the mean; KARS1, Lysyl-tRNA synthetase 1; CEA, Carcinoembryonic antigen, *p* values were calculated using Paired student's t-test (two-tailed) . \* *p* < 0.05, \*\* *p* < 0.0001.
