# Supplementary material for: Plasma Lysyl-tRNA Synthetase 1 (KARS1) as a Novel Diagnostic and Monitoring Biomarker for Colorectal Cancer
Source: MDPI journal article supplement (doi:10.3390/jcm9020533), 2020-02-15
Supplement: s1 [file s1]

**Table S2. Statistical summary for ROC analysis of plasma proteins.**

| Marker  | Cutoff value   | AUC    | <i>p</i> value | Specificity | Sensitivity |
|---------|----------------|--------|----------------|-------------|-------------|
| KARS1   | >1028 (pg/mL)  | 0.8939 | < 0.0001       | 0.7813      | 0.8598      |
| AIMP1   | >1963 (pg/mL)  | 0.7591 | < 0.0001       | 0.7813      | 0.7866      |
| GARS1   | >279.2 (pg/mL) | 0.6287 | 0.0214         | 0.6250      | 0.6585      |
| IL-10   | >125.5 (pg/mL) | 0.8203 | < 0.0001       | 0.7813      | 0.8232      |
| CA 19-9 | >64.17 (U/mL)  | 0.6120 | 0.0451         | 0.6250      | 0.6402      |
| CEA     | >6407 (pg/mL)  | 0.6022 | 0.0676         | 0.5625      | 0.5610      |

AUC, Area under the curve; AIMP1, Aminoacyl tRNA synthetase-interacting multifunctional protein 1; GARS1, Glycyl-tRNA synthetase 1; KARS1, Lysyl-tRNA synthetase 1; IL, Interleukin; CEA, Carcinoembryonic antigen; Cutoff Value defined based on maximized the total value of sensitivity and specificity, ; *p* value, computes the SE differently, assuming that the area is really 0.5 (the null hypothesis) with two-tailed at prism.; value of specificity and sensitivity is value at cut-off.
