# Supplementary material for: Plasma Lysyl-tRNA Synthetase 1 (KARS1) as a Novel Diagnostic and Monitoring Biomarker for Colorectal Cancer
Source: MDPI journal article supplement (doi:10.3390/jcm9020533), 2020-02-15
Supplement: s1 [file s1]

**Table S1. Comparison of the plasma levels of ARSs and cancer biomarkers between healthy controls and CRC patients**

| (pg/mL)       | Healthy     | CRC         | <i>p</i> -value |
|---------------|-------------|-------------|-----------------|
| AIMP1         | 1711±143.5  | 2600±68.32  | < 0.0001        |
| GARS1         | 561.2±137.3 | 535.5±39.08 | < 0.05          |
| HARS1         | 1574±290.1  | 1302±55.33  | 0.602           |
| KARS1         | 775.6±232.8 | 5007±561.1  | < 0.0001        |
| WARS1         | 2345±276.2  | 2683±127.1  | 0.2304          |
| TNF- $\alpha$ | 142.5±20.01 | 113.6±5.092 | 0.196           |
| IL-10         | 87.40±13.17 | 167.9±4.54  | < 0.0001        |
| CA 19-9       | 76.63±11.80 | 284.3±48.03 | < 0.05          |
| CEA           | 6941±664.2  | 11939±785.8 | 0.0676          |

mean  $\pm$  SEM, CA 19-9 unit: U/mL, SEM, Standard error of the mean; CRC, Colorectal cancer; AIMP1, Aminoacyl tRNA synthetase-interacting multifunctional protein 1; GARS1, Glycyl-tRNA synthetase 1; HARS1, Histidyl-tRNA synthetase 1; KARS1, Lysyl-tRNA synthetase 1; WARS1, Tryptophanyl-tRNA synthetase 1; TNF, tumor necrosis factor; IL, Interleukin; CEA, Carcinoembryonic antigen; *p* values were calculated using the Mann-Whitney U test. \* *p* < 0.05, \*\* *p* < 0.0001.
