# Supplementary material for: Plasma Lysyl-tRNA Synthetase 1 (KARS1) as a Novel Diagnostic and Monitoring Biomarker for Colorectal Cancer
Source: J Clin Med. 2020 Feb 15;9(2):533. doi: 10.3390/jcm9020533 (PMC7073917; doi:10.3390/jcm9020533)
Supplement: Supplementary file 1 [file jcm-09-00533-s001.zip]

Archive with 7 entries (7 files):
- FigureS1.tif
- FigureS2.tif
- Supplementary legend.docx
- supplementary TableS1.pdf
- supplementary TableS2.pdf
- supplementary TableS3.pdf
- supplementary TableS4.pdf
